# Supplementary material for: Genome editing without nucleases confers proliferative advantage to edited hepatocytes and corrects Wilson disease
Source: PubMed Central journal article supplement (PMC10721260; doi:10.1172/jci.insight.171281), 2023-11-08
Supplement: jciinsight-8-171281-s131.pdf [file jciinsight-8-171281-s131.pdf]

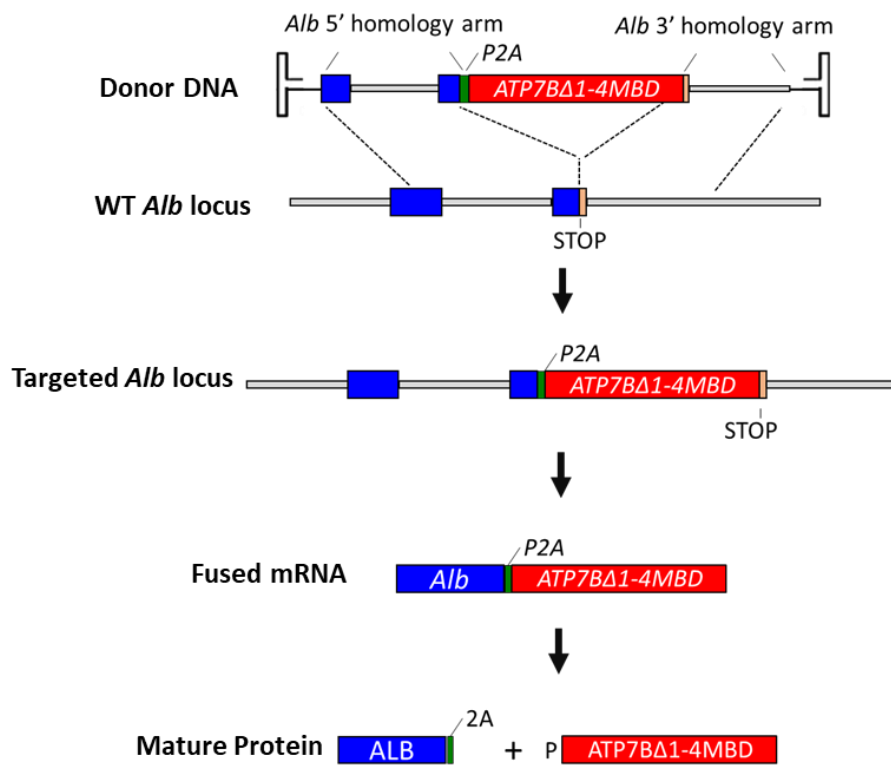

**Figure S1. Schematics for the proposed targeting strategy at the *Alb* locus.**

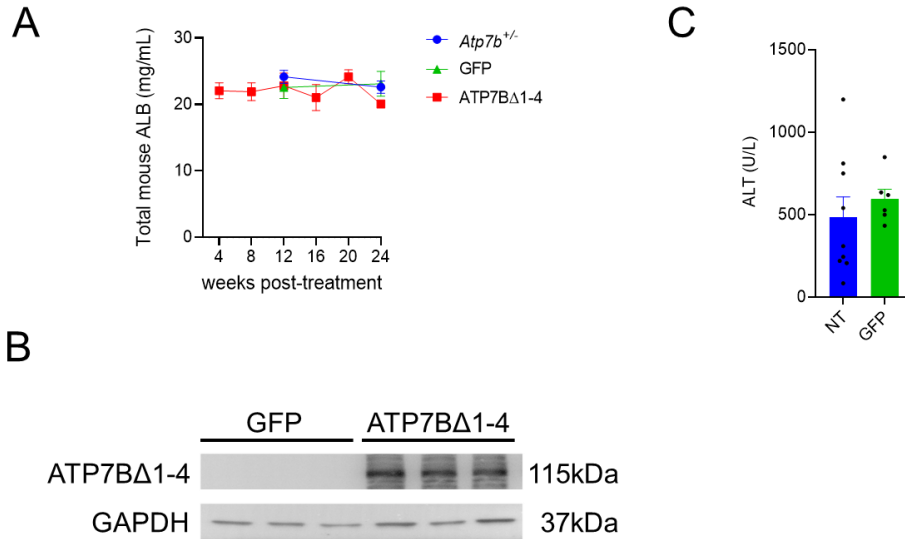

**Figure S2. Promoterless mini-ATP7B administration to *Atp7b*<sup>-/-</sup> mice.** 6-week-old *Atp7b*<sup>-/-</sup> mice were injected with  $2.3 \times 10^{13}$  gc/kg of AAV8-GFP (GFP; n=17) or AAV8-Alb-ATP7BΔ1-4 (ATP7BΔ1-4; n=12). *Atp7b*<sup>+/+</sup> mice (n=17) are shown as healthy controls. **A)** Total serum albumin levels. **B)** Western blot analysis on whole liver lysates using anti-ATP7B antibody. GAPDH is shown as loading control. **C)** Serum ALT levels in untreated (NT) and AAV8-GFP-injected *Atp7b*<sup>-/-</sup> mice at 14-18 weeks of age.

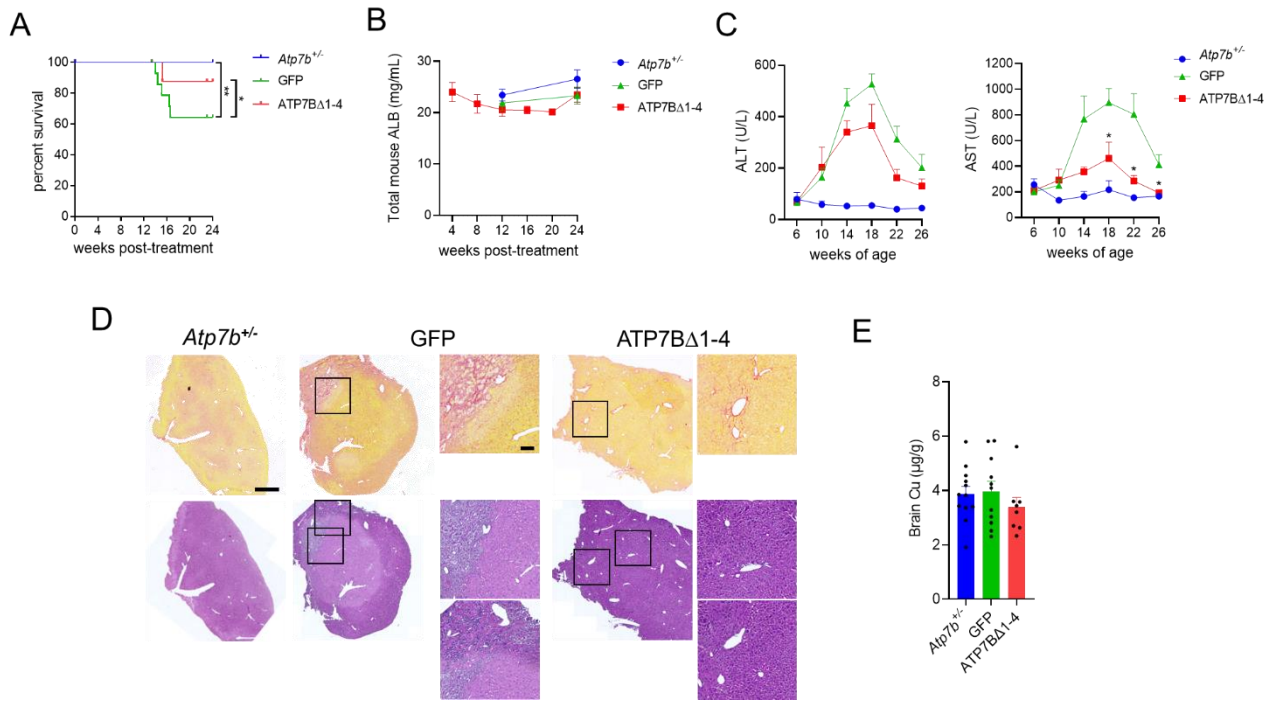

**Figure S3. Promoterless mini-ATP7B rescues survival and ameliorates WD.** 2-week-old *Atp7b*<sup>-/-</sup> mice were injected with  $2.3 \times 10^{13}$  gc/kg of AAV8-GFP (GFP; n=18) or AAV8-Alb-ATP7BΔ1-4 (ATP7BΔ1-4; n=10). *Atp7b*<sup>+/-</sup> mice (n=13) are shown as healthy controls. **A**) Survival curves. Log-rank test: \* $p < 0.05$ ; \*\* $p < 0.01$ . **B**) Total serum albumin levels. **C**) Serum transaminases levels. Data from animals that survived until the end of the study are shown. Two-way ANOVA plus Tukey's post-hoc: \* $p < 0.05$  versus GFP. **D**) Representative images from liver Sirius Red (upper panels) and H&E (lower panels) staining. Scale bar: 200μm. **E**) Copper content analysis by ICP-MS in brain.

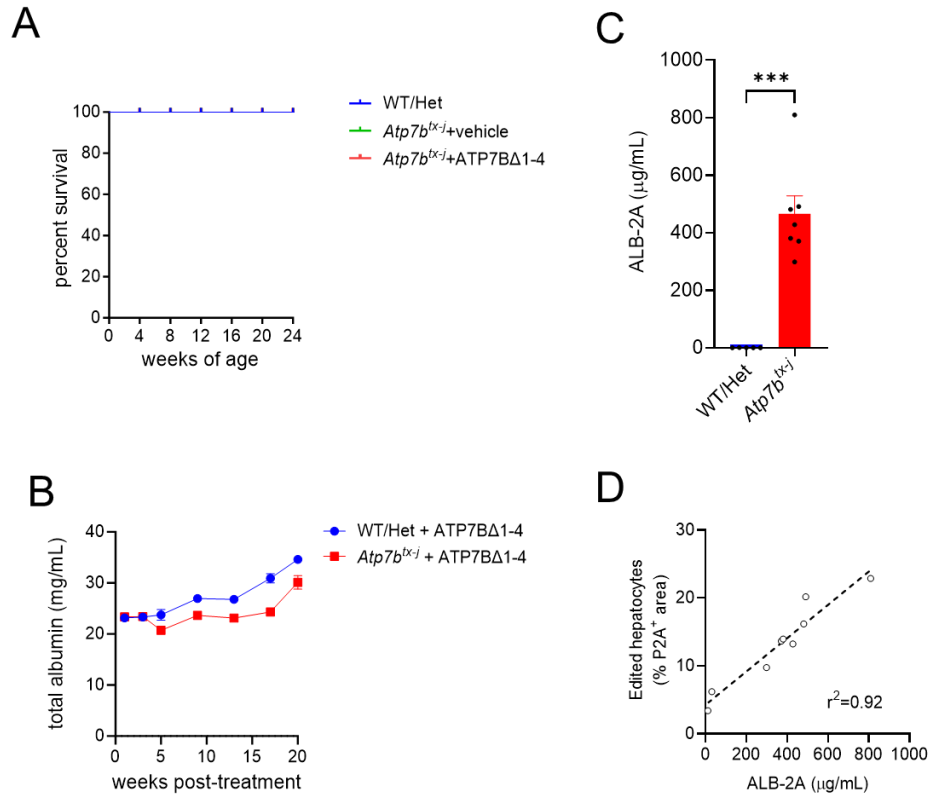

**Figure S4. Promoterless mini-ATP7B administration to *Atp7b<sup>tx-j</sup>* mice.** 3-week-old *Atp7b<sup>tx-j</sup>* and healthy control (WT/Het) mice were injected with  $1 \times 10^{14}$  vg/kg AAV-DJ-Alb-ATP7BΔ1-4. Tissues were harvested at 25 weeks of age. **A)** Survival curve. Serum **B)** total albumin and **C)** ALB-2A analysis. *t*-test: \*\*\* $p < 0.005$  **D)** Linear correlation analysis of P2A staining and serum ALB-2A levels in *Atp7b<sup>tx-j</sup>* mice.

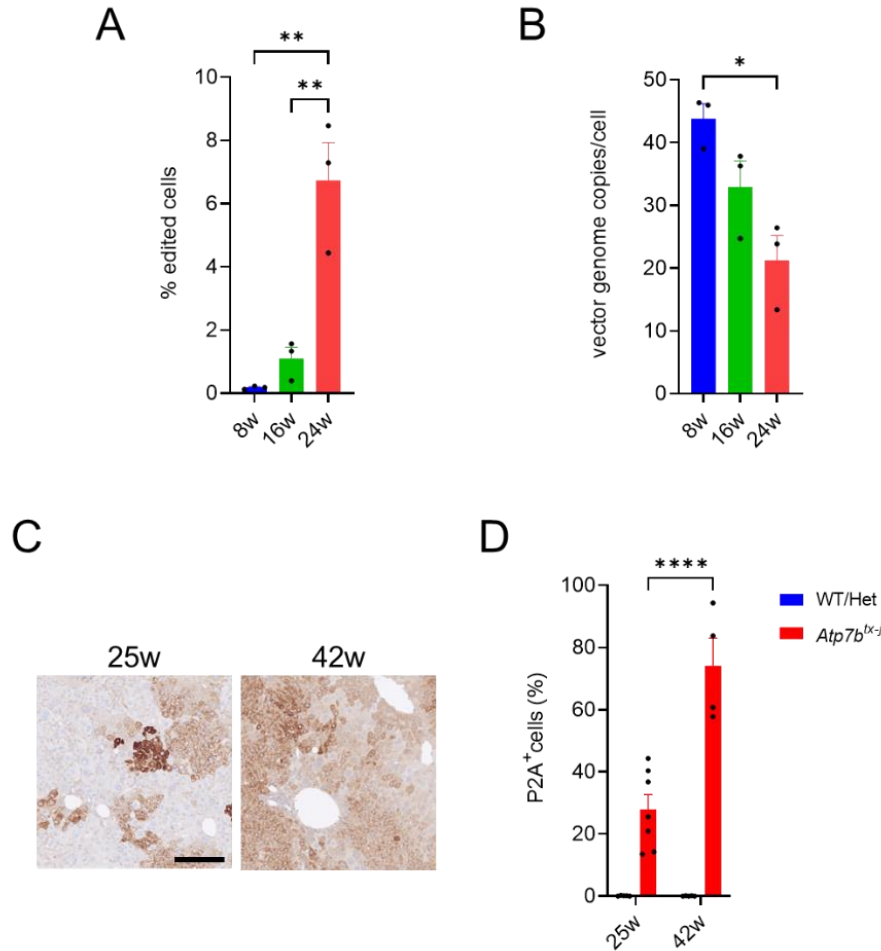

**Figure S5: Molecular analysis of mouse liver samples collected over time reveals an expansion of edited hepatocytes.** *Atp7b<sup>lox-j</sup>* mice were dosed 4 weeks after birth with  $1 \times 10^{14}$  vg/kg AAV-DJ-Alb-ATP7B $\Delta$ 1-4 and a subset of mice were taken down at 8, 16, and 24 weeks after dosing (n=3 per group). **A)** On-target genomic DNA integration analysis. **B)** Assessment of vector genome copy per cell. *Atp7b<sup>lox-j</sup>* and wild-type or heterozygous (WT/Het) healthy control mice were injected with  $1 \times 10^{14}$  vg/kg AAV-DJ-Alb-ATP7B $\Delta$ 1-4 3-4 weeks after birth and sacrificed at 25 or 42 weeks of age (n=4-7 per group). **C)** Representative images of immunohistochemical liver staining for P2A. **D)** Quantification of P2A-positive cells. Data are expressed as percentage over total liver cells. One- (A, B) or two-way (D) plus Tukey's post-hoc analysis: \*p<0.05; \*\*p<0.01; \*\*\*\*p<0.001

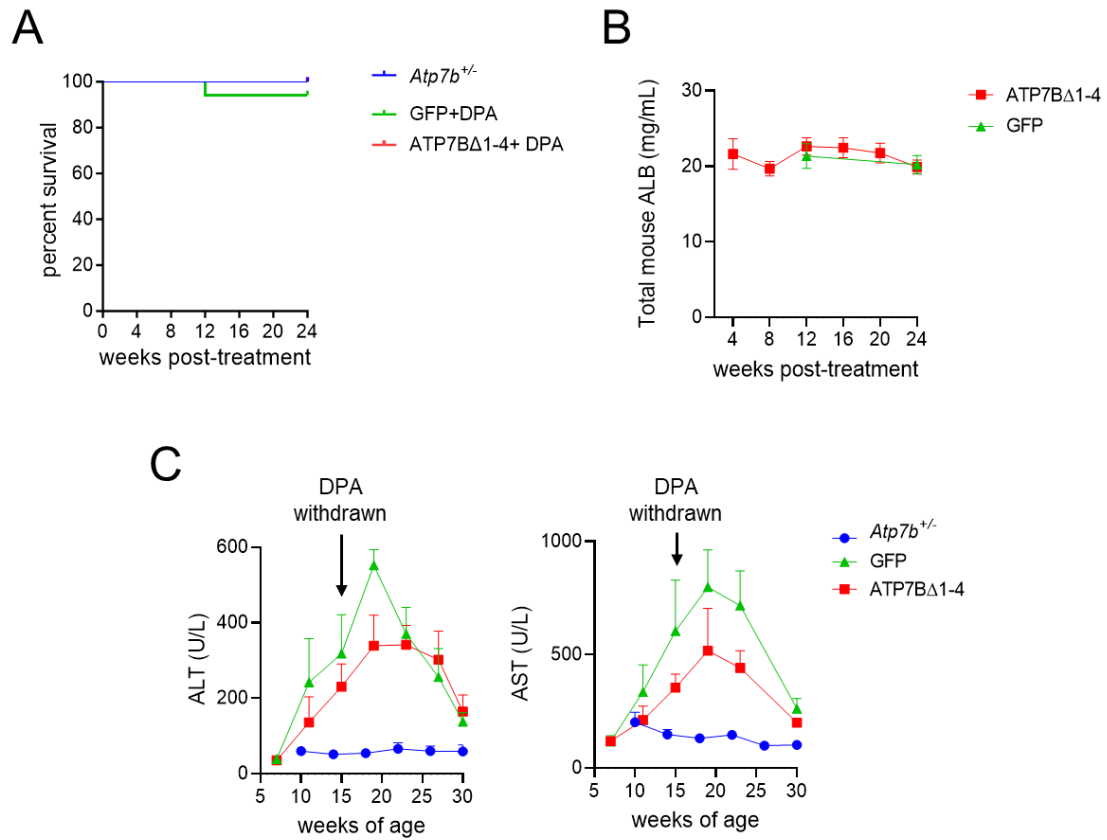

**Figure S6. Combination of genome editing and chelator therapy ameliorates WD.** 6-week-old *Atp7b*<sup>-/-</sup> mice were treated with D-penicillamine (DPA) and then injected with  $2.3 \times 10^{13}$  gc/kg of AAV8-GFP (GFP; n=6) or AAV8-Alb-ATP7BΔ1-4 (ATP7BΔ1-4; n=6). *Atp7b*<sup>+/-</sup> mice (n=13) are shown as healthy controls. **A)** Survival curve. **B)** Total serum albumin levels. **C)** Serum transaminase activities.

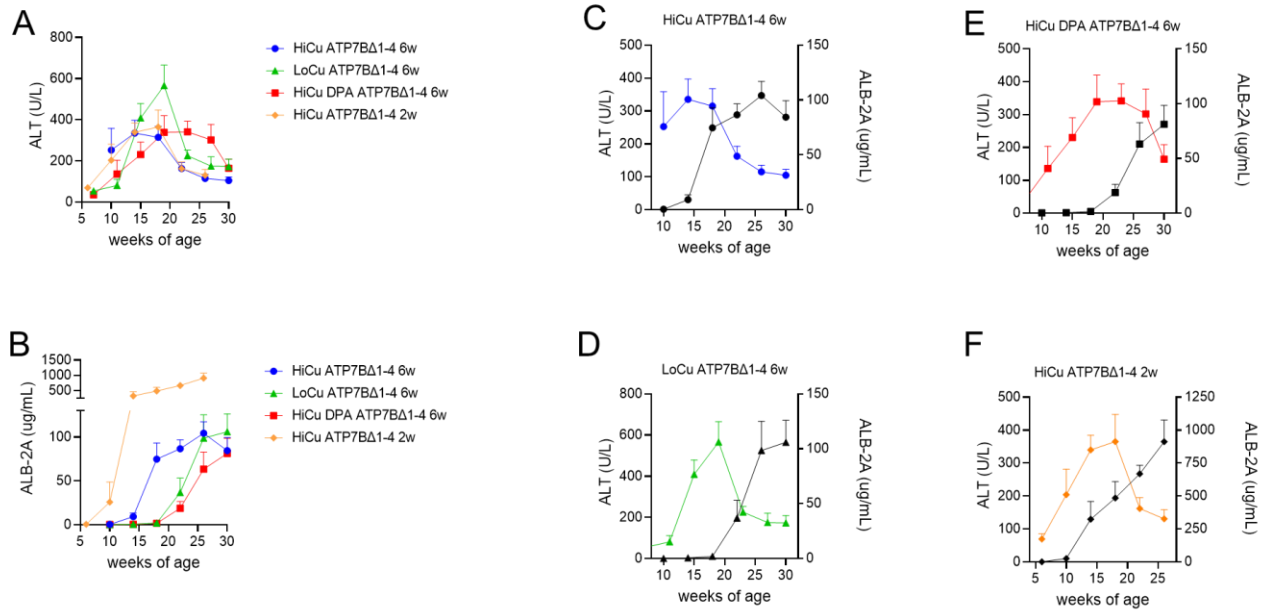

**Figure S7. Liver damage modulates repopulation speed by ATP7BΔ1-4-edited hepatocytes in *Atp7b*<sup>-/-</sup> mice.** *Atp7b*<sup>-/-</sup> mice were fed with high- (HiCu) or low-copper (LoCu) content chow, treated with D-penicillamine (DPA) or left untreated and injected with  $2.3 \times 10^{13}$  gc/kg of AAV8-Alb-ATP7BΔ1-4 at 2 or 6 weeks of age. Serum **A)** ALT and **B)** ALB-2A fusion protein levels in all experimental groups. **C-F)** Serum ALT (left y axis, coloured lines) and ALB-2A (right y axis, black lines) in single experimental groups. Data from HiCu 6w, HiCu DPA 6w, and HiCu 2w were already presented in previous figures.
